# Supplementary material
Source: PubMed Central journal article supplement (PMC4779388)
Supplement: NIHMS743683-supplement-01.pdf [file NIHMS743683-supplement-01.pdf]

**Supplemental table 1 Men's dairy intake in relation to rates of clinical outcomes in IVF and ICSI cycles (per initiated cycle) from the EARTH Study**

|                                          | Implantation rate |                   | Clinical pregnancy rate |                   | Live birth rate   |                   |
|------------------------------------------|-------------------|-------------------|-------------------------|-------------------|-------------------|-------------------|
|                                          | Conventional IVF  | ICSI              | Conventional IVF        | ICSI              | Conventional IVF  | ICSI              |
| <b>Number of cycles</b>                  | 85                | 99                | 85                      | 99                | 85                | 99                |
| <b>Quartile intake of total dairy</b>    |                   |                   |                         |                   |                   |                   |
| Q1 [0.00-1.31]                           | 0.76 (0.35, 0.95) | 0.52 (0.19, 0.83) | 0.74 (0.33, 0.95)       | 0.46 (0.19, 0.77) | 0.37 (0.10, 0.75) | 0.40 (0.13, 0.74) |
| Q2 [1.44-1.81]                           | 0.88 (0.48, 0.98) | 0.13 (0.03, 0.42) | 0.86 (0.45, 0.98)       | 0.12 (0.03, 0.38) | 0.64 (0.24, 0.91) | 0.11 (0.02, 0.39) |
| Q3 [1.86-2.73]                           | 0.68 (0.35, 0.90) | 0.57 (0.27, 0.82) | 0.58 (0.25, 0.85)       | 0.55 (0.29, 0.79) | 0.31 (0.10, 0.65) | 0.46 (0.20, 0.73) |
| Q4 [2.75-5.77]                           | 0.80 (0.38, 0.96) | 0.40 (0.13, 0.74) | 0.73 (0.30, 0.94)       | 0.33 (0.12, 0.65) | 0.72 (0.29, 0.94) | 0.32 (0.10, 0.66) |
| P trend                                  | 0.90              | 0.95              | 0.71                    | 0.86              | 0.39              | 0.95              |
| <b>Quartile intake of full-fat dairy</b> |                   |                   |                         |                   |                   |                   |
| Q1 [0.00-0.59]                           | 0.67 (0.28, 0.92) | 0.23 (0.05, 0.61) | 0.65 (0.26, 0.91)       | 0.23 (0.06, 0.57) | 0.29 (0.07, 0.67) | 0.15 (0.03, 0.49) |
| Q2 [0.61-1.04]                           | 0.91 (0.56, 0.99) | 0.36 (0.11, 0.71) | 0.87 (0.48, 0.98)       | 0.37 (0.14, 0.69) | 0.62 (0.24, 0.89) | 0.38 (0.13, 0.70) |
| Q3 [1.06-1.67]                           | 0.71 (0.36, 0.92) | 0.44 (0.15, 0.78) | 0.68 (0.32, 0.91)       | 0.44 (0.17, 0.75) | 0.42 (0.16, 0.74) | 0.35 (0.12, 0.68) |
| Q4 [1.76-5.45]                           | 0.88 (0.42, 0.99) | 0.57 (0.24, 0.84) | 0.79 (0.30, 0.97)       | 0.47 (0.21, 0.75) | 0.75 (0.30, 0.95) | 0.41 (0.16, 0.71) |
| P trend                                  | 0.78              | 0.16              | 0.91                    | 0.27              | 0.28              | 0.31              |
| <b>Quartile intake of low-fat dairy</b>  |                   |                   |                         |                   |                   |                   |
| Q1 [0.00-0.24]                           | 0.79 (0.28, 0.97) | 0.62 (0.29, 0.87) | 0.73 (0.23, 0.96)       | 0.57 (0.27, 0.82) | 0.47 (0.10, 0.88) | 0.47 (0.20, 0.76) |
| Q2 [0.28-0.63]                           | 0.66 (0.28, 0.90) | 0.27 (0.07, 0.63) | 0.63 (0.26, 0.89)       | 0.29 (0.09, 0.62) | 0.38 (0.12, 0.74) | 0.29 (0.09, 0.63) |
| Q3 [0.63-1.10]                           | 0.74 (0.39, 0.93) | 0.36 (0.12, 0.70) | 0.61 (0.26, 0.87)       | 0.34 (0.13, 0.64) | 0.43 (0.15, 0.75) | 0.28 (0.10, 0.59) |
| Q4 [1.20-3.54]                           | 0.88 (0.50, 0.98) | 0.30 (0.07, 0.72) | 0.86 (0.48, 0.98)       | 0.27 (0.07, 0.66) | 0.67 (0.25, 0.93) | 0.27 (0.06, 0.66) |
| P trend                                  | 0.35              | 0.40              | 0.40                    | 0.33              | 0.37              | 0.42              |

Abbreviations: ICSI, intra-cytoplasmic sperm injection; IVF, in vitro fertilization. BMI=body mass index

Model adjusted for total energy intake, age, BMI, alcohol, caffeine, smoking status, total exercise time, Prudent dietary pattern, Western dietary pattern, and female dairy intake.

Tests for trend were performed using the median level of dairy in each quartile as a continuous variable in the model.

**Supplemental table 2 Men's dairy intake in relation to rates of clinical outcomes in IVF and ICSI cycles ( per embryo transfer ) from the EARTH Study**

|                                          | Implantation rate |                   | Clinical pregnancy rate |                   | Live birth rate   |                   |
|------------------------------------------|-------------------|-------------------|-------------------------|-------------------|-------------------|-------------------|
|                                          | Conventional IVF  | ICSI              | Conventional IVF        | ICSI              | Conventional IVF  | ICSI              |
| <b>Number of cycles</b>                  | 83                | 96                | 83                      | 96                | 83                | 96                |
| <b>Quartile intake of total dairy</b>    |                   |                   |                         |                   |                   |                   |
| Q1 [0.00-1.31]                           | 0.75 (0.32, 0.95) | 0.52 (0.20, 0.82) | 0.73 (0.30, 0.95)       | 0.47 (0.20, 0.76) | 0.36 (0.10, 0.75) | 0.40 (0.14, 0.73) |
| Q2 [1.44-1.81]                           | 0.90 (0.51, 0.99) | 0.14 (0.03, 0.43) | 0.88 (0.47, 0.98)       | 0.13 (0.04, 0.39) | 0.66 (0.25, 0.92) | 0.13 (0.03, 0.43) |
| Q3 [1.86-2.73]                           | 0.69 (0.35, 0.91) | 0.57 (0.28, 0.82) | 0.59 (0.26, 0.86)       | 0.56 (0.31, 0.79) | 0.32 (0.10, 0.67) | 0.46 (0.22, 0.72) |
| Q4 [2.75-5.77]                           | 0.80 (0.38, 0.96) | 0.42 (0.15, 0.75) | 0.73 (0.30, 0.94)       | 0.36 (0.14, 0.66) | 0.72 (0.30, 0.94) | 0.34 (0.11, 0.67) |
| P trend                                  | 0.95              | 0.99              | 0.74                    | 0.91              | 0.37              | 0.89              |
| <b>Quartile intake of full-fat dairy</b> |                   |                   |                         |                   |                   |                   |
| Q1 [0.00-0.59]                           | 0.68 (0.28, 0.92) | 0.26 (0.07, 0.63) | 0.65 (0.26, 0.91)       | 0.25 (0.07, 0.60) | 0.29 (0.07, 0.68) | 0.18 (0.04, 0.52) |
| Q2 [0.61-1.04]                           | 0.91 (0.54, 0.99) | 0.34 (0.11, 0.68) | 0.86 (0.47, 0.98)       | 0.36 (0.13, 0.67) | 0.62 (0.24, 0.89) | 0.38 (0.14, 0.69) |
| Q3 [1.06-1.67]                           | 0.73 (0.37, 0.92) | 0.41 (0.14, 0.75) | 0.70 (0.33, 0.92)       | 0.42 (0.16, 0.73) | 0.44 (0.16, 0.76) | 0.33 (0.12, 0.66) |
| Q4 [1.76-5.45]                           | 0.87 (0.40, 0.99) | 0.63 (0.29, 0.87) | 0.79 (0.29, 0.97)       | 0.51 (0.24, 0.78) | 0.75 (0.30, 0.95) | 0.45 (0.19, 0.74) |
| P trend                                  | 0.76              | 0.11              | 0.90                    | 0.21              | 0.28              | 0.27              |
| <b>Quartile intake of low-fat dairy</b>  |                   |                   |                         |                   |                   |                   |
| Q1 [0.00-0.24]                           | 0.76 (0.26, 0.97) | 0.60 (0.27, 0.86) | 0.71 (0.21, 0.96)       | 0.55 (0.26, 0.81) | 0.46 (0.10, 0.87) | 0.45 (0.19, 0.74) |
| Q2 [0.28-0.60]                           | 0.66 (0.28, 0.90) | 0.29 (0.08, 0.66) | 0.63 (0.26, 0.89)       | 0.31 (0.10, 0.65) | 0.39 (0.12, 0.75) | 0.32 (0.10, 0.66) |
| Q3 [0.63-1.10]                           | 0.77 (0.41, 0.94) | 0.42 (0.15, 0.75) | 0.64 (0.28, 0.89)       | 0.39 (0.15, 0.69) | 0.45 (0.16, 0.77) | 0.33 (0.12, 0.65) |
| Q4 [1.20-3.54]                           | 0.88 (0.51, 0.98) | 0.28 (0.06, 0.70) | 0.86 (0.48, 0.98)       | 0.25 (0.06, 0.65) | 0.68 (0.26, 0.93) | 0.25 (0.06, 0.65) |
| P trend                                  | 0.29              | 0.38              | 0.35                    | 0.31              | 0.34              | 0.42              |

Abbreviations: ICSI, intra-cytoplasmic sperm injection; IVF, in vitro fertilization. BMI=body mass index

Model adjusted for total energy intake, age, BMI, alcohol, caffeine, smoking status, total exercise time, Prudent dietary pattern, Western dietary pattern, and female dairy intake.

Tests for trend were performed using the median level of dairy in each quartile as a continuous variable in the model.
